# Supplementary material for: The HLS19-COM-P, a New Instrument for Measuring Communicative Health Literacy in Interaction with Physicians: Development and Validation in Nine European Countries
Source: MDPI journal article supplement (doi:10.3390/ijerph191811592), 2022-09-14
Supplement: s1 [file s1]

**Table S1.** Fit indices considered in confirmatory factor analysis

| Category         | Fit indices                                                   | Good-model-fit criteria <sup>#</sup>                                         |
|------------------|---------------------------------------------------------------|------------------------------------------------------------------------------|
| Absolute Fit     | Standardized Root Mean Square Residual (SRMR)                 | Values <0.05 indicate good model fit; Values <0.08 are considered acceptable |
|                  | Goodness of Fit Index (GFI)                                   | Values ≥0.95 indicate good model fit; Values >0.9 are considered acceptable  |
|                  | Adjusted Goodness of Fit (AGFI)                               | Values ≥0.95 indicate good model fit; Values >0.9 are considered acceptable  |
| Comparative Fit  | Comparative Fit Index (CFI)                                   | Values ≥0.95 indicate good model fit; Values >0.9 are considered acceptable  |
| Parsimonious Fit | Tucker-Lewis Index (TLI)                                      |                                                                              |
|                  | Root-mean-squared error of approximation (RMSEA) <sup>i</sup> | Values <0.05 indicate good model fit; Values <0.08 are considered acceptable |

<sup>i</sup>Sometimes also grouped as *Absolute fit*

References: [52, 53].
