# Supplementary material for: The HLS19-COM-P, a New Instrument for Measuring Communicative Health Literacy in Interaction with Physicians: Development and Validation in Nine European Countries
Source: MDPI journal article supplement (doi:10.3390/ijerph191811592), 2022-09-14
Supplement: s1 [file s1]

**Table S2.** Analyses and tests with reference values considered in Rasch analyses

| <b>Analyses</b>                     | <b>Tests</b>                         | <b>Reference value</b>                                                                                                                                                                                                                            | <b>Software</b> |
|-------------------------------------|--------------------------------------|---------------------------------------------------------------------------------------------------------------------------------------------------------------------------------------------------------------------------------------------------|-----------------|
| Data-model fit                      | Total item $\chi^2$ with $p$ -values | Insignificant total item $\chi^2$ indicates good data-model fit                                                                                                                                                                                   | RUMM2030Plus    |
| Targeting                           | Person-item location                 | The distribution of person location estimates is compared to the distribution of the item location estimates.<br>Mean person location values close to 0 indicate good targeting between the person's ability and the item difficulty <sup>a</sup> | RUMM2030Plus    |
| Dimensionality                      | PCA/ $t$ -test procedure             | Proportions of significant $t$ -tests >5 % indicate multidimensionality <sup>b</sup>                                                                                                                                                              | RUMM2030Plus    |
| Response dependence                 | Residual correlations                | >0.3 indicates response dependence <sup>c</sup>                                                                                                                                                                                                   | RUMM2030Plus    |
| Item fit                            | $\chi^2$ statistics with $p$ -values | $P$ -values <5 % Bonferroni-adjusted are deemed as misfit                                                                                                                                                                                         | RUMM2030Plus    |
|                                     | fit residuals                        | Values below/above -2.5/ 2.5 indicate over-/under-discrimination <sup>a</sup>                                                                                                                                                                     | RUMM2030Plus    |
|                                     | Infit weighted mean square (MNSQ)    | Infit values between 0.7 and 1.3 was considered as sufficient. Values lower than 0.7 indicate over-discrimination, whereas values higher above 1.3 indicate under-discrimination <sup>d</sup>                                                     | ConQuest5       |
| Differential item functioning (DIF) | Analysis of variance (two-way ANOVA) | High F-values with probability <5% Bonferroni-adjusted indicates DIF <sup>e</sup>                                                                                                                                                                 | RUMM2030Plus    |
| Ordering of response categories     | Ordering of thresholds               | Inspecting the thresholds to determine whether they are in correct order <sup>e</sup>                                                                                                                                                             | RUMM2030Plus    |
| Reliability                         | Person separation index (PSI)        | >0.85 at individual level >0.65 at group level <sup>f</sup>                                                                                                                                                                                       | RUMM2030Plus    |

Suggestions for references (a selection) for the different analyses: <sup>a</sup>[45], <sup>b</sup>[6-48], <sup>c</sup>[55], <sup>d</sup>[54], <sup>e</sup>[56-58], <sup>f</sup>[40].
