# Supplementary material for: The HLS19-COM-P, a New Instrument for Measuring Communicative Health Literacy in Interaction with Physicians: Development and Validation in Nine European Countries
Source: MDPI journal article supplement (doi:10.3390/ijerph191811592), 2022-09-14
Supplement: s1 [file s1]

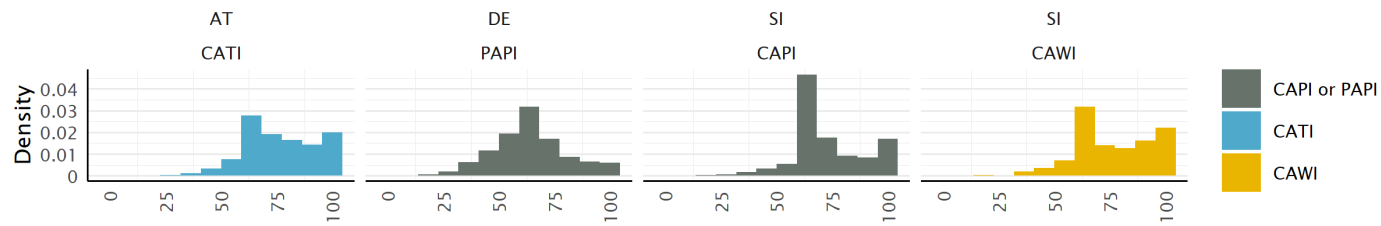

**Figure S2a.** Distribution of HLS<sub>19</sub>-COM-P-Q11 polytomous score by country and survey mode. CAPI= computer personal interviews; CATI computer-assisted telephone interviews; CAWI= computer-assisted web interviews; PAPI= paper-assisted personal interviews.

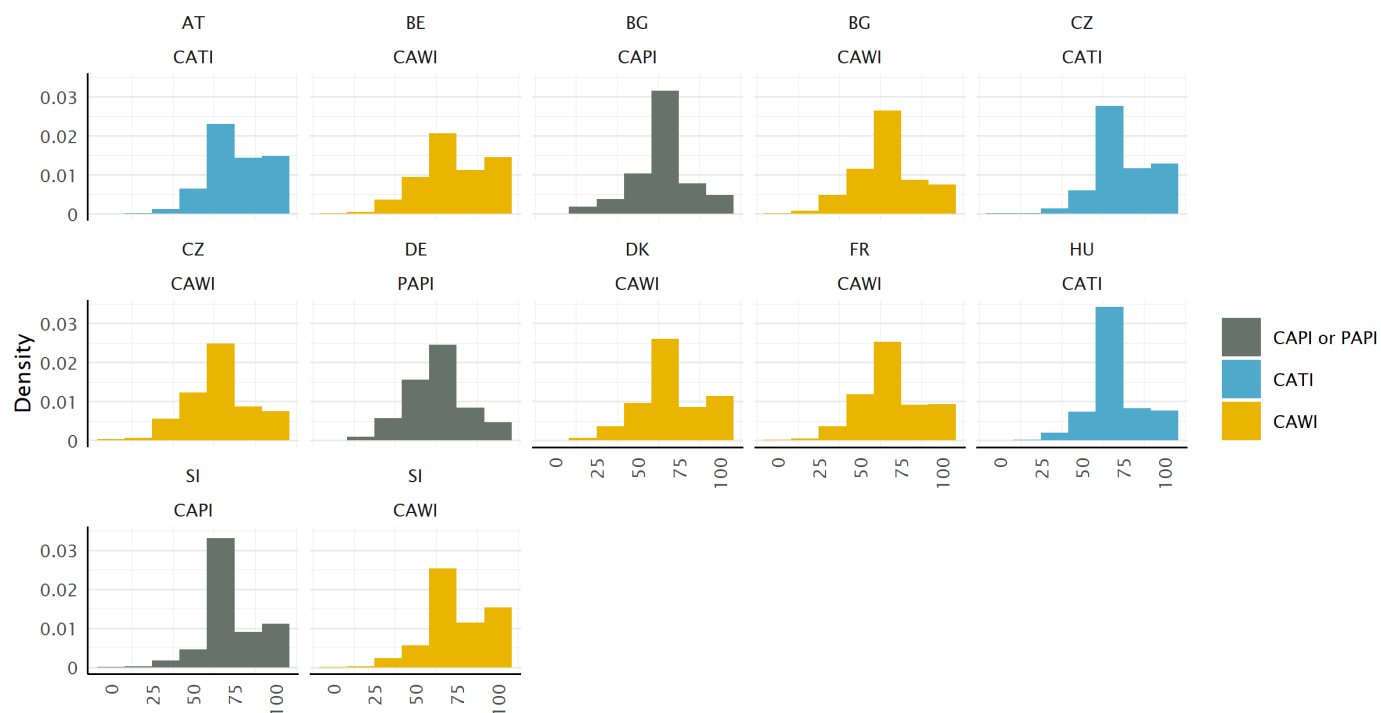

**Figure S2b.** Distribution of HLS<sub>19</sub>-COM-P-Q6 polytomous score by country and survey mode. CAPI= computer personal interviews; CATI computer-assisted telephone interviews; CAWI= computer-assisted web interviews; PAPI= paper-assisted personal interviews.
