# Supplementary material for: The HLS19-COM-P, a New Instrument for Measuring Communicative Health Literacy in Interaction with Physicians: Development and Validation in Nine European Countries
Source: MDPI journal article supplement (doi:10.3390/ijerph191811592), 2022-09-14
Supplement: s1 [file s1]

**Table S4.** Item fit statistics for HLS19-COM-P-Q6 for each country

| Country                        | Item  | Location | Fit.res. <sup>i</sup> | Chi sq <sup>i</sup><br>n=540 | Chi sq<br>prob <sup>i</sup> | Infit<br>MNSQ <sup>i</sup> | DIF <sup>i</sup><br>n=540                                                                                                      |
|--------------------------------|-------|----------|-----------------------|------------------------------|-----------------------------|----------------------------|--------------------------------------------------------------------------------------------------------------------------------|
| <b>Austria</b>                 | COM3  | -0.663   | -0.903                | 8.088                        | 0.088                       | 1.03                       | -                                                                                                                              |
|                                | COM4  | 1.124    | 3.215                 | 12.101                       | 0.017                       | 1.21                       | -                                                                                                                              |
|                                | COM5  | 0.244    | -7.609                | 9.920                        | 0.042                       | 0.88                       | -                                                                                                                              |
|                                | COM8  | -0.371   | -5.605                | 9.087                        | 0.059                       | 0.92                       | -                                                                                                                              |
|                                | COM9  | -0.127   | -3.930                | 3.519                        | 0.475                       | 0.93                       | -                                                                                                                              |
|                                | COM10 | -0.207   | 2.536                 | 7.092                        | 0.131                       | 1.15                       | -                                                                                                                              |
| <b>Belgium<sup>i</sup></b>     | COM3  | -0.411   | 0.276                 | 5.107                        | 0.277                       | 1.07                       | -                                                                                                                              |
|                                | COM4  | 0.467    | 0.903                 | 8.181                        | 0.085                       | 1.16                       | -                                                                                                                              |
|                                | COM5  | 0.159    | -4.997                | 16.462                       | 0.002                       | 0.85                       | -                                                                                                                              |
|                                | COM8  | -0.522   | -7.954                | 28.393                       | <0.001*                     | 0.76                       | -                                                                                                                              |
|                                | COM9  | 0.006    | -3.357                | 8.083                        | 0.089                       | 0.91                       | -                                                                                                                              |
|                                | COM10 | 0.301    | 3.020                 | 19.731                       | <0.001                      | 1.29                       | -                                                                                                                              |
| <b>Bulgaria</b>                | COM3  | -0.905   | -2.688                | 10.653                       | 0.031                       | 0.97                       | -                                                                                                                              |
| <b>CAPI, n=402<sup>a</sup></b> | COM4  | 0.785    | 3.016                 | 23.911                       | <0.001*                     | 1.36                       | age (categorized<br>1 <sup>st</sup> version)*,<br>education*, status<br>of employment*,<br>level in society,<br>general health |
|                                | COM5  | 0.031    | -4.676                | 4.155                        | 0.385                       | 0.80                       | -                                                                                                                              |
|                                | COM8  | -0.490   | -4.983                | 13.011                       | 0.011                       | 0.79                       | age (categorized<br>1 <sup>st</sup> version) <sup>#</sup>                                                                      |
|                                | COM9  | 0.013    | -4.157                | 5.329                        | 0.255                       | 0.88                       | -                                                                                                                              |
|                                | COM10 | 0.567    | 0.078                 | 5.844                        | 0.211                       | 1.13                       | -                                                                                                                              |
| <b>Bulgaria</b>                | COM3  | -1.154   | 0.111                 | 25.797                       | <0.001*                     | 1.14                       | age (categorized<br>1 <sup>st</sup> version)* <sup>#</sup> ,                                                                   |
| <b>CAWI, n=457</b>             | COM4  | 1.046    | 2.008                 | 29.962                       | <0.001*                     | 1.27                       | -                                                                                                                              |
|                                | COM5  | -0.078   | -4.804                | 9.692                        | 0.046                       | 0.77                       | -                                                                                                                              |
|                                | COM8  | -0.568   | -4.853                | 11.482                       | 0.022                       | 0.82                       | -                                                                                                                              |
|                                | COM9  | 0.218    | -2.440                | 7.274                        | 0.122                       | 0.89                       | -                                                                                                                              |
|                                | COM10 | 0.535    | 0.832                 | 8.968                        | 0.062                       | 1.15                       | -                                                                                                                              |

|                           |       |        |         |        |         |      |                         |
|---------------------------|-------|--------|---------|--------|---------|------|-------------------------|
| <b>Czechia</b>            | COM3  | -0.634 | -2,271  | 27,561 | <0.001* | 0.97 | -                       |
| <b>CATI</b>               | COM4  | 0.378  | -1,221  | 4,117  | 0,390   | 1.10 | -                       |
|                           | COM5  | -0.115 | -3,714  | 14,909 | 0,005   | 0.90 | -                       |
|                           | COM8  | -0.445 | -4,305  | 16,832 | 0,002   | 0.84 | status of<br>employment |
|                           | COM9  | 0.211  | -2,613  | 9,012  | 0,061   | 0.93 | -                       |
|                           | COM10 | 0.605  | 1,982   | 32,589 | <0.001* | 1.39 | -                       |
| <b>Czechia</b>            | COM3  | -0.983 | -2.250  | 15.824 | 0.003   | 0.97 | -                       |
| <b>CAWI</b>               | COM4  | 0.373  | 0.459   | 7.813  | 0.099   | 1.09 | -                       |
|                           | COM5  | 0.351  | -6.171  | 10.307 | 0.036   | 0.85 | -                       |
|                           | COM8  | -0.429 | -5.683  | 11.631 | 0.020   | 0.86 | -                       |
|                           | COM9  | 0.485  | -3.571  | 11.664 | 0.020   | 0.91 | -                       |
|                           | COM10 | 0.202  | 3.482   | 19.643 | 0.001   | 1.34 | -                       |
| <b>Denmark</b>            | COM3  | -0.781 | -6.843  | 16.221 | 0.002   | 0.95 | -                       |
|                           | COM4  | 1.273  | 7.212   | 42.432 | <0.001* | 1.36 | -                       |
|                           | COM5  | 0.011  | -15.154 | 18.448 | 0.001   | 0.79 | -                       |
|                           | COM8  | -0.483 | -16.249 | 18.971 | 0.001   | 0.77 | -                       |
|                           | COM9  | -0.125 | -11.622 | 11.426 | 0.022   | 0.85 | -                       |
|                           | COM10 | 0.103  | 4.871   | 22.522 | <0.001* | 1.37 | -                       |
| <b>France<sup>i</sup></b> | COM3  | -0.792 | -3.915  | 16.762 | 0.002   | 1.02 | -                       |
|                           | COM4  | 0.567  | -0.147  | 6.531  | 0.162   | 1.16 | -                       |
|                           | COM5  | 0.585  | -4.252  | 10.354 | 0.035   | 0.98 | -                       |
|                           | COM8  | -0.678 | -7.4    | 16.791 | 0.002   | 0.90 | -                       |
|                           | COM9  | 0.163  | -7.955  | 9.113  | 0.058   | 0.85 | -                       |
|                           | COM10 | 0.154  | 0.572   | 7.219  | 0.125   | 1.21 | -                       |
| <b>Germany</b>            | COM3  | -1.238 | -1.943  | 16.259 | 0.003   | 1.00 | -                       |
|                           | COM4  | 0.997  | 2.116   | 9.979  | 0.041   | 1.10 | -                       |
|                           | COM5  | 0.407  | -5.113  | 4.385  | 0.357   | 0.92 | -                       |
|                           | COM8  | -0.346 | -6.135  | 8.21   | 0.084   | 0.88 | -                       |
|                           | COM9  | 0.324  | -2.241  | 2.808  | 0.591   | 0.94 | -                       |
|                           | COM10 | -0.144 | 3.745   | 10.241 | 0.037   | 1.17 | -                       |

|                 |       |        |         |        |         |      |   |
|-----------------|-------|--------|---------|--------|---------|------|---|
| <b>Hungary</b>  | COM3  | -0.266 | -4.453  | 5.619  | 0.230   | 1.01 | - |
|                 | COM4  | 0.751  | -3.242  | 12.854 | 0.012   | 1.08 | - |
|                 | COM5  | 0.201  | -7.962  | 11.780 | 0.019   | 0.81 | - |
|                 | COM8  | -0.355 | -7.449  | 7.902  | 0.095   | 0.86 | - |
|                 | COM9  | 0.184  | -5.748  | 7.144  | 0.129   | 0.91 | - |
|                 | COM10 | -0.515 | 1.577   | 32.830 | <0.001* | 1.33 | - |
| <b>Slovenia</b> | COM3  | -0.299 | -6.303  | 7.088  | 0.131   | 0.88 | - |
| <b>CAWI</b>     | COM4  | 0.795  | 0.122   | 11.34  | 0.022   | 1.19 | - |
|                 | COM5  | 0.550  | -4.992  | 13.948 | 0.008   | 0.92 | - |
|                 | COM8  | -0.669 | -4.487  | 8.882  | 0.064   | 0.99 | - |
|                 | COM9  | 0.128  | -6.192  | 14.208 | 0.007   | 0.87 | - |
|                 | COM10 | -0.504 | 1.022   | 15.928 | 0.003   | 1.24 | - |
| <b>Slovenia</b> | COM3  | -0.507 | -9.109  | 14.951 | 0.005   | 0.91 | - |
| <b>CAPI</b>     | COM4  | 0.406  | -4.702  | 5.825  | 0.213   | 1.10 | - |
|                 | COM5  | -0.031 | -10.789 | 5.324  | 0.256   | 0.83 | - |
|                 | COM8  | -0.348 | -8.637  | 14.947 | 0.005   | 0.89 | - |
|                 | COM9  | 0.589  | -5.509  | 22.011 | <0.001  | 1.00 | - |
|                 | COM10 | -0.109 | -2.679  | 5.617  | 0.230   | 1.19 | - |

<sup>i</sup> complete data

<sup>#</sup>non-uniform DIF. All other DIFs were uniform.

CAPI= computer-assisted personal interviews; CATI computer-assisted telephone interviews; CAWI= computer-assisted web interviews; Chi sq prob = Chi-square probability; Fit.resid. = Fit residual; MNSQ = mean square; PAPI= paper-assisted personal interviews.

<sup>i</sup> Reference: [39].
