# Supplementary material for: The HLS19-COM-P, a New Instrument for Measuring Communicative Health Literacy in Interaction with Physicians: Development and Validation in Nine European Countries
Source: MDPI journal article supplement (doi:10.3390/ijerph191811592), 2022-09-14
Supplement: s1 [file s1]

**Table S3.** Item fit statistics for HLS19-COM-P-Q11 for each country

| Country  | Item  | Location | Fit.res. <sup>i</sup> | Chi sq<br><i>n</i> =990<br>(df=4) <sup>i</sup> | Chi sq<br>prob<br>(df=4) <sup>i</sup> | Infit<br>MNSQ <sup>i</sup> | DIF <sup>i</sup><br><i>n</i> =990                                      |
|----------|-------|----------|-----------------------|------------------------------------------------|---------------------------------------|----------------------------|------------------------------------------------------------------------|
| Austria  | COM1  | -1.105   | 1.140                 | 20.956                                         | <0.001*                               | 1.07                       | -                                                                      |
|          | COM2  | 0.100    | -1.807                | 1.936                                          | 0.748                                 | 1.02                       | -                                                                      |
|          | COM3  | -0.584   | -4.478                | 9.510                                          | 0.050                                 | 0.95                       | -                                                                      |
|          | COM4  | 1.204    | 3.868                 | 19.668                                         | 0.001                                 | 1.21                       | age<br>(dichotomized),<br>age (categorized<br>2 <sup>nd</sup> version) |
|          | COM5  | 0.345    | -7.175                | 9.744                                          | 0.045                                 | 0.89                       | -                                                                      |
|          | COM6  | 0.165    | -6.666                | 14.962                                         | 0.005                                 | 0.90                       | -                                                                      |
|          | COM7  | 0.380    | 3.209                 | 14.114                                         | 0.007                                 | 1.18                       | -                                                                      |
|          | COM8  | -0.260   | -6.835                | 13.580                                         | 0.009                                 | 0.91                       | -                                                                      |
|          | COM9  | -0.058   | -5.135                | 7.025                                          | 0.135                                 | 0.92                       | -                                                                      |
|          | COM10 | -0.132   | 0.23                  | 6.174                                          | 0.187                                 | 1.12                       | -                                                                      |
|          | COM11 | -0.055   | -1.219                | 4.636                                          | 0.327                                 | 1.04                       | -                                                                      |
| Germany  | COM1  | -1.948   | -1.152                | 31,491                                         | <0.001*                               | 1.05                       | -                                                                      |
|          | COM2  | -0.081   | -2.428                | 2,474                                          | 0.649                                 | 1.00                       | -                                                                      |
|          | COM3  | -1.139   | -4.387                | 21,444                                         | <0.001                                | 0.93                       | -                                                                      |
|          | COM4  | 1.132    | 2.312                 | 9,542                                          | 0,049                                 | 1.11                       | -                                                                      |
|          | COM5  | 0.543    | -3.771                | 5,285                                          | 0,259                                 | 0.96                       | -                                                                      |
|          | COM6  | 0.047    | -5.928                | 8,83                                           | 0,066                                 | 0.86                       | -                                                                      |
|          | COM7  | 1.163    | 2.126                 | 12,039                                         | 0,017                                 | 1.10                       | education*                                                             |
|          | COM8  | -0.212   | -6.269                | 11,362                                         | 0,023                                 | 0.89                       | -                                                                      |
|          | COM9  | 0.444    | -2.298                | 6,072                                          | 0,194                                 | 0.97                       | -                                                                      |
|          | COM10 | -0.027   | 2.169                 | 11,987                                         | 0,018                                 | 1.15                       | -                                                                      |
|          | COM11 | 0.08     | 0.820                 | 6,212                                          | 0,184                                 | 1.11                       | -                                                                      |
| Slovenia | COM1  | -0.600   | -2.120                | 30.502                                         | <0.001*                               | 1.02                       | -                                                                      |
| CAWI     | COM2  | -0.098   | -4.925                | 7.308                                          | 0,121                                 | 0.92                       | -                                                                      |
|          | COM3  | -0.098   | -8.006                | 11.917                                         | 0,018                                 | 0.83                       | -                                                                      |
|          | COM4  | 0.983    | 1.124                 | 22.221                                         | <0.001                                | 1.18                       | -                                                                      |
|          | COM5  | 0.768    | -3.391                | 20.394                                         | <0.001                                | 1.01                       | -                                                                      |

|                  |       |        |         |        |         |      |                                               |
|------------------|-------|--------|---------|--------|---------|------|-----------------------------------------------|
|                  | COM6  | 0.257  | -6.280  | 12.622 | 0.013   | 0.89 | age<br>(dichotomized),<br>education           |
|                  | COM7  | -0.376 | -2.029  | 6.824  | 0.146   | 1.11 | education*,<br>ability to pay bills*          |
|                  | COM8  | -0.466 | -4.440  | 8.925  | 0.063   | 1.00 | -                                             |
|                  | COM9  | 0.306  | -7.518  | 25.793 | <0.001* | 0.81 | -                                             |
|                  | COM10 | -0.349 | -1.244  | 11.826 | 0.019   | 1.14 | -                                             |
|                  | COM11 | -0.327 | -1.260  | 3.842  | 0.428   | 1.09 | -                                             |
| <b>Slovenia*</b> | COM1  | -0.818 | -5.025  | 24.671 | <0.001* | 1.02 | -                                             |
| <b>CAPI</b>      | COM2  | -0.271 | -7.792  | 2.599  | 0.458   | 0.96 | -                                             |
|                  | COM3  | -0.361 | -11.284 | 15.547 | 0.001   | 0.84 | -                                             |
|                  | COM4  | 0.555  | -3.548  | 16.233 | 0.001   | 1.16 | -                                             |
|                  | COM5  | 0.131  | -10.365 | 7.585  | 0.055   | 0.85 | --                                            |
|                  | COM6  | 0.051  | -8.980  | 6.403  | 0.094   | 0.89 | -                                             |
|                  | COM7  | 0.060  | -5.481  | 1.65   | 0.648   | 1.03 | -                                             |
|                  | COM8  | -0.194 | -9.367  | 15.64  | 0.002   | 0.88 | -                                             |
|                  | COM9  | 0.744  | -4.006  | 45.754 | <0.001* | 1.08 | -                                             |
|                  | COM10 | 0.008  | -4.245  | 3.591  | 0.309   | 1.13 | age (categorized<br>2 <sup>nd</sup> version)* |
|                  | COM11 | 0.095  | -4.397  | 2.019  | 0.568   | 1.07 | -                                             |

\*statistically significant when sample size = 660; \*df = 3; CAPI = computer-assisted personal interviews; CAWI = computer-assisted web interviews; Chi sq prob = Chi-square probability; DIF = differential item functioning; Fit.resid. = Fit residual; MNSQ = mean square.

<sup>i</sup> Reference: [39].
