# Supplementary material for: The HLS19-COM-P, a New Instrument for Measuring Communicative Health Literacy in Interaction with Physicians: Development and Validation in Nine European Countries
Source: Int J Environ Res Public Health. 2022 Sep 14;19(18):11592. doi: 10.3390/ijerph191811592 (PMC9517091; doi:10.3390/ijerph191811592)
Supplement: Supplementary file 1 [file ijerph-19-11592-s001.zip]

Archive with 6 entries (6 files):
- Supplementary_FigureS1a_FigureS1b.pdf
- Supplementary_FigureS2a_FigureS2b.pdf
- Supplementary_TableS3_Item fitHLS19-COM-P-Q11.pdf
- Supplementary_TableS4_ItemfitHLS19-COM-P-Q6.pdf
- TableS1Supplementary about CFA.pdf
- TableS2Supplementary about Rasch analyses.pdf
